# Supplementary material for: Molecular Cloning and Functional Characterization of Heat Stress-Responsive Superoxide Dismutases in Garlic (Allium sativum L.)
Source: MDPI journal article supplement (doi:10.3390/antiox10050815), 2021-05-20
Supplement: s1 [file s1]

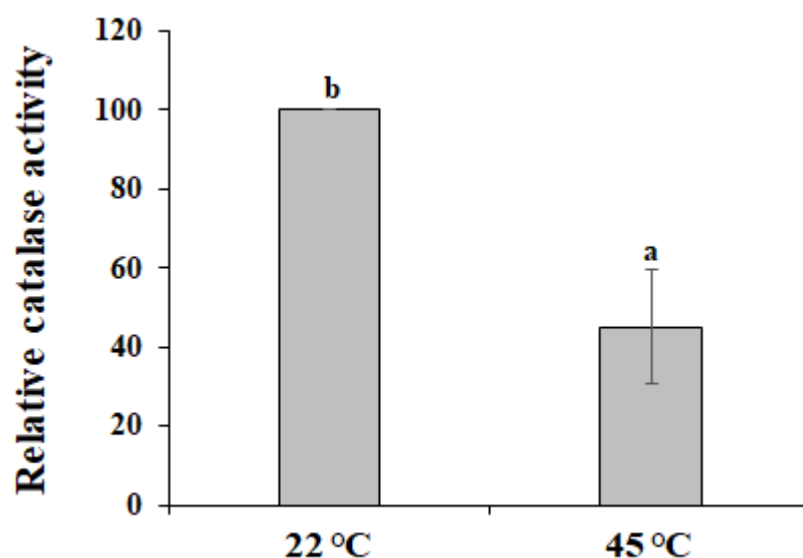

Figure S1. Heat stress reduced total catalase activity.

Table S1. Primer sequences used in this study.

|             | Primer      | Sequences (5'–3')           | Accession number/Reference |
|-------------|-------------|-----------------------------|----------------------------|
| For cloning | AS_SOD1-F   | CACCATGGTGAAGGCAGTTACTG     | NS-3057                    |
|             | AS_SOD1-Rev | GCTCTGGAGTCCAATGATACC       |                            |
|             | AS_SOD2-F   | CACCATGGCACTCAGAGCACTC      | NS-3058                    |
|             | AS_SOD2-Rev | CCAAGAGTAGCTCGTGCAAAT       |                            |
|             | AS_SOD3-F   | CACCATGGCTTCTTCAATCGCT      | NS-3059                    |
|             | AS_SOD3-Rev | TGCCACTGGTGTCAATCCAAC       |                            |
| For qRT-PCR | AS_SOD4-F   | CACCATGTCTTTCTTCCGACTC      | NS-3060                    |
|             | AS_SOD4-Rev | TGCAGTCTCTTTTTCATACAC       |                            |
|             | AsSOD1-F    | GCCATGCTGGTGACCTTGGA        | NS-3057                    |
|             | AsSOD1-Rev  | GGGCCAGTGAGTGGGATCTG        |                            |
|             | AsSOD2-F    | GGCGAAGCAAACAGCCTCAT        | NS-3058                    |
|             | AsSOD2-Rev  | AGTATCGCCGAACGAGTGGA        |                            |
|             | AsSOD3-F    | TGGAGTGGCAGAGGCGACTA        | NS-3059                    |
|             | AsSOD3-Rev  | TCCCAGTGCTGAGGCTGAGT        |                            |
|             | AsSOD4-F    | GGCGAGCCTCCTCATGGTTC        | NS-3060                    |
|             | AsSOD4-Rev  | CCAGAGCAAGCCACACCCAA        |                            |
|             | AsACTIN-F   | TGCTCTGGATTATGAACAGGAAGTTGA | Wang et al. 2019 [24]      |
|             | AsACTIN-Rev | CAATCATTGAAGGCTGGAACAACACT  |                            |

Table S2. Information of garlic SOD genes cloned in this study.

| Name   | CDS (bp) | AA  | pI   | kDa   | Localization <sup>a</sup> | Accession number (NABIC) |
|--------|----------|-----|------|-------|---------------------------|--------------------------|
| AsSOD1 | 459      | 152 | 5.59 | 15.28 | Cytoplasm                 | NS-3057                  |
| AsSOD2 | 492      | 163 | 6.28 | 16.73 | Cytoplasm                 | NS-3058                  |
| AsSOD3 | 633      | 210 | 6.74 | 21.36 | Chloroplast               | NS-3059                  |
| AsSOD4 | 711      | 236 | 7.10 | 26.44 | Mitochondrion             | NS-3060                  |

<sup>a</sup> Prediction by Plant-mSubP.
